# Supplementary material
Source: PubMed Central journal article supplement (PMC6391221)
Supplement: NIHMS1515039-supplement-Supp1.pdf [file NIHMS1515039-supplement-Supp1.pdf]

# Effect Modification of Ambient Particle Mortality by Radon: A Time Series Analysis in 108 U.S. Cities

Annelise J. Blomberg, Brent A. Coull, Iny Jhun, Carolina L. Z. Vieira, Antonella Zanobetti, Eric Garshick, Joel Schwartz and Petros Koutrakis

## SUPPLEMENTAL MATERIAL

### Table of Contents

|                                                                                                                                                                                                                                                                                     |   |
|-------------------------------------------------------------------------------------------------------------------------------------------------------------------------------------------------------------------------------------------------------------------------------------|---|
| <b>Table S1:</b> Summary statistics for all cities included in analysis, including the years of study, total number of study days, SRRS and LBL radon (Rn) values, mean two-day moving-averaged PM <sub>2.5</sub> , and mean daily number of deaths. ....                           | 2 |
| <b>Table S2:</b> Estimated percent change in mortality associated with a 10 µg/m <sup>3</sup> increase in PM <sub>2.5</sub> . Results are presented at the 10th and 90th percentile of radon (SRRS: 20.1 and 234.2 Bq/m <sup>3</sup> ; LBL: 18.1 and 108.0 Bq/m <sup>3</sup> )..... | 5 |
| <b>Figure S1:</b> Forest plots of city- and season-specific PM <sub>2.5</sub> effect estimates, ordered by mean city radon concentrations (SRRS).....                                                                                                                               | 6 |
| <b>Figure S2:</b> Results of the SRRS meta-regression, with and without adjustment for additional city characteristics. ....                                                                                                                                                        | 7 |
| <b>Figure S3:</b> Results of the LBL meta-regression, with and without adjustment for additional city characteristics.....                                                                                                                                                          | 8 |

**Table S1:** Summary statistics for all cities included in analysis, including the years of study, total number of study days, SRRS and LBL radon (Rn) values, mean two-day moving-averaged PM<sub>2.5</sub>, and mean daily number of deaths.

| City              | State | Years     | Total Days | SRRS Rn<br>(Bq/m <sup>3</sup> ) | LBL Rn<br>(Bq/m <sup>3</sup> ) | PM <sub>2.5</sub><br>(µg/m <sup>3</sup> ) | Tot | CVD | Resp |
|-------------------|-------|-----------|------------|---------------------------------|--------------------------------|-------------------------------------------|-----|-----|------|
| Birmingham        | AL    | 1999-2011 | 4,748      | 55.5                            | 41.4                           | 15.3                                      | 23  | 6   | 2    |
| Montgomery        | AL    | 2008-2010 | 1,096      | 33.3                            | 27.8                           | 11.6                                      | 5   | 1   | 0    |
| Little Rock       | AR    | 2000-2009 | 3,653      | 33.3                            | 26.3                           | 13.2                                      | 8   | 2   | 1    |
| Phoenix           | AZ    | 1999-2001 | 1,096      | 62.9                            | 45.9                           | 11.4                                      | 56  | 17  | 7    |
| Tucson            | AZ    | 2002-2006 | 1,826      | 51.8                            | 38.9                           | 6.1                                       | 19  | 5   | 2    |
| Anaheim           | CA    | 2002-2008 | 2,557      | 25.9                            | 21.5                           | 14.7                                      | 43  | 14  | 4    |
| Bakersfield       | CA    | 2005-2006 | 730        | 51.8                            | 39.6                           | 18.6                                      | 13  | 4   | 2    |
| Fresno            | CA    | 2004-2008 | 1,827      | 48.1                            | 34.4                           | 17.2                                      | 15  | 4   | 2    |
| Los Angeles       | CA    | 2000-2008 | 3,288      | 25.9                            | 17                             | 17.5                                      | 151 | 52  | 15   |
| Riverside         | CA    | 2001-2006 | 2,191      | 11.1                            | 18.9                           | 19.9                                      | 64  | 21  | 7    |
| Sacramento        | CA    | 2000-2006 | 2,557      | 37                              | 22.2                           | 12.4                                      | 24  | 7   | 3    |
| San Diego         | CA    | 1999-2008 | 3,653      | 22.2                            | 18.1                           | 14                                        | 50  | 15  | 5    |
| Denver            | CO    | 2000-2009 | 3,653      | 159.1                           | 108.8                          | 9.5                                       | 24  | 6   | 3    |
| Hartford          | CT    | 2006-2008 | 1,096      | 92.1                            | 21.5                           | 10.1                                      | 19  | 6   | 2    |
| New Haven         | CT    | 2003-2008 | 2,192      | 186.5                           | 26.6                           | 12.6                                      | 19  | 5   | 2    |
| New London        | CT    | 2007-2008 | 731        | 101.8                           | 30.7                           | 10.2                                      | 5   | 1   | 1    |
| Stamford          | CT    | 2007-2008 | 731        | 116.9                           | 34.8                           | 11.1                                      | 16  | 5   | 2    |
| Wilmington        | DE    | 2000-2007 | 2,922      | 81.2                            | 20.4                           | 14.8                                      | 10  | 3   | 1    |
| Fort Lauderdale   | FL    | 1999-2006 | 2,922      | 14.8                            | 18.5                           | 8.4                                       | 40  | 14  | 3    |
| Jacksonville      | FL    | 2000-2006 | 2,557      | 11.1                            | 15.5                           | 10.4                                      | 17  | 5   | 2    |
| Miami             | FL    | 1999-2002 | 1,461      | 29.6                            | 28.5                           | 9.7                                       | 48  | 18  | 4    |
| Orlando           | FL    | 1999-2006 | 2,922      | 18.5                            | 21.8                           | 10.2                                      | 23  | 7   | 2    |
| Palm Beach        | FL    | 1999-2006 | 2,922      | 14.8                            | 18.1                           | 8                                         | 33  | 11  | 3    |
| Saint Petersburg  | FL    | 1999-2006 | 2,922      | 14.8                            | 17.4                           | 10.4                                      | 22  | 7   | 2    |
| Tampa             | FL    | 1999-2002 | 1,461      | 37                              | 27.8                           | 12.1                                      | 22  | 7   | 2    |
| Atlanta           | GA    | 1999-2011 | 4,748      | 77.7                            | 61                             | 15.2                                      | 43  | 11  | 4    |
| Macon-Bibb County | GA    | 2009-2011 | 1,095      | 44.4                            | 40                             | 12.8                                      | 4   | 1   | 0    |
| Cedar Rapids      | IA    | 2000-2005 | 2,192      | 233.1                           | 93.6                           | 11                                        | 4   | 1   | 1    |
| Davenport         | IA    | 2000-2006 | 2,557      | 303.4                           | 125.1                          | 12.2                                      | 7   | 2   | 1    |
| Des Moines        | IA    | 2000-2006 | 2,557      | 421.8                           | 176.1                          | 10.4                                      | 7   | 2   | 1    |
| Chicago           | IL    | 2000-2006 | 2,557      | 103.6                           | 33.3                           | 15.5                                      | 133 | 42  | 12   |
| Gary              | IN    | 1999-2002 | 1,461      | 48.1                            | 30.7                           | 16.1                                      | 12  | 4   | 1    |
| Indianapolis      | IN    | 2000-2008 | 3,288      | 181.3                           | 100.6                          | 15.7                                      | 19  | 5   | 2    |
| Lafayette         | IN    | 2007-2008 | 731        | 262.7                           | 117.3                          | 12.2                                      | 3   | 1   | 0    |
| Kansas City       | KS    | 1999-2002 | 1,461      | 133.2                           | 69.9                           | 12.5                                      | 28  | 8   | 3    |
| Louisville        | KY    | 2001-2009 | 3,287      | 118.4                           | 70.7                           | 15                                        | 17  | 5   | 2    |
| Baton Rouge       | LA    | 2001-2004 | 1,461      | 14.8                            | 14.1                           | 12.7                                      | 9   | 3   | 1    |
| New Orleans       | LA    | 2000-2004 | 1,827      | 11.1                            | 11.5                           | 12.5                                      | 23  | 6   | 2    |
| Boston            | MA    | 2003-2013 | 4,018      | 62.9                            | 27                             | 10.4                                      | 55  | 15  | 6    |

| City          | State | Years     | Total Days | SRRS Rn<br>(Bq/m <sup>3</sup> ) | LBL Rn<br>(Bq/m <sup>3</sup> ) | PM <sub>2.5</sub><br>(µg/m <sup>3</sup> ) | Tot | CVD | Resp |
|---------------|-------|-----------|------------|---------------------------------|--------------------------------|-------------------------------------------|-----|-----|------|
| Springfield   | MA    | 2001-2003 | 1,095      | 74                              | 25.9                           | 12.2                                      | 12  | 3   | 1    |
| Baltimore     | MD    | 2001-2009 | 3,287      | 77.7                            | 20.7                           | 14.1                                      | 37  | 11  | 3    |
| Detroit       | MI    | 2000-2013 | 5,114      | 48.1                            | 29.6                           | 13.3                                      | 90  | 30  | 8    |
| Grand Haven   | MI    | 2007-2008 | 731        | 66.6                            | 36.6                           | 11.4                                      | 4   | 1   | 0    |
| Grand Rapids  | MI    | 1999-2005 | 2,557      | 66.6                            | 41.1                           | 13.4                                      | 10  | 3   | 1    |
| Holland       | MI    | 2001-2005 | 1,826      | 48.1                            | 34.8                           | 12.2                                      | 2   | 1   | 0    |
| Minneapolis   | MN    | 2001-2002 | 730        | 170.2                           | 106.2                          | 11                                        | 30  | 7   | 3    |
| St. Louis     | MO    | 1999-2009 | 4,018      | 85.1                            | 36.3                           | 14                                        | 37  | 12  | 4    |
| Charlotte     | NC    | 2000-2009 | 3,653      | 40.7                            | 21.1                           | 14                                        | 12  | 3   | 1    |
| Durham        | NC    | 2002-2004 | 1,096      | 51.8                            | 19.6                           | 13.8                                      | 4   | 1   | 0    |
| Greensboro    | NC    | 2000-2005 | 2,192      | 66.6                            | 21.8                           | 14.4                                      | 9   | 2   | 1    |
| Raleigh       | NC    | 2000-2006 | 2,557      | 92.5                            | 28.1                           | 14.2                                      | 9   | 2   | 1    |
| Winston-Salem | NC    | 1999-2004 | 2,192      | 133.2                           | 68.5                           | 15                                        | 7   | 2   | 1    |
| Omaha         | NE    | 2000-2006 | 2,557      | 236.8                           | 118                            | 10.2                                      | 9   | 2   | 1    |
| Elizabeth     | NJ    | 2001-2002 | 730        | 81.4                            | 23.3                           | 13.9                                      | 12  | 4   | 1    |
| Albuquerque   | NM    | 2000-2008 | 3,288      | 136.9                           | 107.7                          | 6.5                                       | 11  | 3   | 1    |
| Las Vegas     | NV    | 1999-2006 | 2,922      | 38.7                            | 26.6                           | 9.4                                       | 32  | 10  | 4    |
| Albany        | NY    | 2007-2009 | 1,096      | 136.9                           | 52.2                           | 9.1                                       | 7   | 2   | 1    |
| Bath          | NY    | 2005-2009 | 1,826      | 414.4                           | 80.7                           | 8.1                                       | 3   | 1   | 0    |
| Buffalo       | NY    | 2007-2009 | 1,096      | 162.8                           | 45.5                           | 10.5                                      | 24  | 7   | 2    |
| New York      | NY    | 2000-2006 | 2,557      | 51.8                            | 48.5                           | 13.9                                      | 148 | 65  | 12   |
| Akron         | OH    | 1999-2004 | 2,192      | 118.4                           | 55.5                           | 16.1                                      | 14  | 4   | 2    |
| Canton        | OH    | 2009-2012 | 1,461      | 203.5                           | 84.7                           | 12.7                                      | 10  | 3   | 1    |
| Cincinnati    | OH    | 1999-2004 | 2,192      | 77.7                            | 43.7                           | 17                                        | 21  | 6   | 2    |
| Cleveland     | OH    | 1999-2004 | 2,192      | 74                              | 33.3                           | 16.9                                      | 51  | 18  | 4    |
| Columbus      | OH    | 1999-2004 | 2,192      | 273.8                           | 148.7                          | 16.3                                      | 21  | 6   | 2    |
| Middletown    | OH    | 2000-2003 | 1,461      | 148                             | 79.9                           | 16.2                                      | 7   | 2   | 1    |
| Steubenville  | OH    | 2011-2013 | 1,096      | 70.3                            | 64.8                           | 11.1                                      | 3   | 1   | 0    |
| Toledo        | OH    | 2001-2003 | 1,095      | 96.2                            | 55.5                           | 14.9                                      | 11  | 4   | 1    |
| Youngstown    | OH    | 1999-2004 | 2,192      | 99.9                            | 60.3                           | 15.5                                      | 11  | 4   | 1    |
| Oklahoma City | OK    | 2005-2006 | 730        | 33.3                            | 23.3                           | 9.8                                       | 16  | 5   | 2    |
| Tulsa         | OK    | 2005-2006 | 730        | 40.7                            | 25.9                           | 11.3                                      | 13  | 4   | 1    |
| Eugene        | OR    | 1999-2004 | 2,192      | 59.2                            | 25.5                           | 10.2                                      | 7   | 2   | 1    |
| Medford       | OR    | 1999-2002 | 1,461      | 37                              | 22.6                           | 10.6                                      | 5   | 1   | 0    |
| Portland      | OR    | 1999-2002 | 1,461      | 122.1                           | 54.4                           | 8.7                                       | 28  | 7   | 3    |
| Allentown     | PA    | 2000-2009 | 3,653      | 595.7                           | 199.1                          | 13.6                                      | 8   | 2   | 1    |
| Erie          | PA    | 2004-2005 | 731        | 177.6                           | 48.5                           | 12.8                                      | 7   | 2   | 1    |
| Gettysburg    | PA    | 2001-2009 | 3,287      | 251.6                           | 77                             | 12.7                                      | 2   | 1   | 0    |
| Harrisburg    | PA    | 2001-2009 | 3,287      | 843.6                           | 161.3                          | 14.6                                      | 6   | 2   | 1    |
| Mercer        | PA    | 2002-2005 | 1,461      | 181.3                           | 52.5                           | 13.8                                      | 4   | 1   | 0    |
| Philadelphia  | PA    | 2004-2009 | 2,192      | 85.1                            | 33.7                           | 13.1                                      | 103 | 29  | 10   |
| Pittsburgh    | PA    | 2000-2009 | 3,653      | 173.9                           | 60.3                           | 16                                        | 37  | 12  | 4    |

| City           | State | Years     | Total Days | SRRS Rn<br>(Bq/m <sup>3</sup> ) | LBL Rn<br>(Bq/m <sup>3</sup> ) | PM <sub>2.5</sub><br>(µg/m <sup>3</sup> ) | Tot | CVD | Resp |
|----------------|-------|-----------|------------|---------------------------------|--------------------------------|-------------------------------------------|-----|-----|------|
| Scranton       | PA    | 2000-2009 | 3,653      | 111                             | 49.2                           | 11.5                                      | 18  | 6   | 2    |
| State College  | PA    | 2003-2009 | 2,557      | 521.7                           | 143.9                          | 12                                        | 3   | 1   | 0    |
| Washington     | PA    | 2003-2009 | 2,557      | 133.2                           | 57.4                           | 13.4                                      | 6   | 2   | 1    |
| Columbia       | SC    | 2007-2009 | 1,096      | 37                              | 22.2                           | 11.9                                      | 11  | 3   | 1    |
| Greenville     | SC    | 2000-2009 | 3,653      | 111                             | 48.1                           | 14.2                                      | 8   | 2   | 1    |
| Spartanburg    | SC    | 1999-2009 | 4,018      | 55.5                            | 40.3                           | 13.5                                      | 6   | 2   | 1    |
| Knoxville      | TN    | 2003-2006 | 1,461      | 96.2                            | 68.8                           | 15.4                                      | 12  | 3   | 1    |
| Memphis        | TN    | 2001-2005 | 1,826      | 37                              | 32.6                           | 13.4                                      | 19  | 6   | 2    |
| Nashville      | TN    | 2004-2005 | 731        | 188.7                           | 90.7                           | 13.5                                      | 12  | 4   | 1    |
| Austin         | TX    | 2000-2002 | 1,096      | 51.8                            | 32.2                           | 10.4                                      | 10  | 3   | 1    |
| Corpus Christi | TX    | 2006-2007 | 730        | 25.9                            | 17.4                           | 9.8                                       | 7   | 2   | 1    |
| Dallas         | TX    | 2000-2009 | 3,653      | 44.4                            | 32.9                           | 11.8                                      | 35  | 10  | 3    |
| El Paso        | TX    | 2000-2002 | 1,096      | 37                              | 24.8                           | 9.6                                       | 10  | 3   | 1    |
| Fort Worth     | TX    | 2000-2007 | 2,922      | 40.7                            | 30.7                           | 11.9                                      | 25  | 7   | 2    |
| Houston        | TX    | 2000-2009 | 3,653      | 14.8                            | 14.4                           | 12.9                                      | 53  | 15  | 4    |
| Port Arthur    | TX    | 2001-2004 | 1,461      | 11.1                            | 12.2                           | 11                                        | 7   | 2   | 1    |
| San Antonio    | TX    | 2001-2002 | 730        | 40.7                            | 27.8                           | 9.1                                       | 26  | 8   | 2    |
| Ogden          | UT    | 2008-2009 | 731        | 129.5                           | 101.4                          | 9.6                                       | 4   | 1   | 0    |
| Salt Lake City | UT    | 1999-2009 | 4,018      | 88.8                            | 103.6                          | 11.4                                      | 13  | 3   | 1    |
| Annandale      | VA    | 2007-2009 | 1,096      | 77.7                            | 43.3                           | 11.3                                      | 11  | 3   | 1    |
| Norfolk        | VA    | 2004-2009 | 2,192      | 29.6                            | 12.2                           | 11.4                                      | 25  | 7   | 3    |
| Richmond       | VA    | 2000-2009 | 3,653      | 51.8                            | 31.4                           | 12.8                                      | 15  | 4   | 2    |
| Seattle        | WA    | 1999-2005 | 2,557      | 14.8                            | 14.4                           | 9.5                                       | 29  | 8   | 3    |
| Spokane        | WA    | 2000-2002 | 1,096      | 366.3                           | 232                            | 9.8                                       | 9   | 3   | 1    |
| Tacoma         | WA    | 1999-2002 | 1,461      | 29.6                            | 20.4                           | 11.2                                      | 13  | 4   | 1    |
| Beaver Dam     | WI    | 2004-2005 | 731        | 177.6                           | 109.9                          | 11                                        | 2   | 1   | 0    |
| Milwaukee      | WI    | 1999-2001 | 1,096      | 114.7                           | 66.2                           | 13.7                                      | 30  | 9   | 3    |

**Table S2:** Estimated percent change in mortality associated with a 10  $\mu\text{g}/\text{m}^3$  increase in  $\text{PM}_{2.5}$ . Results are presented at the 10th and 90th percentile of radon (SRRS: 20.1 and 234.2  $\text{Bq}/\text{m}^3$ ; LBL: 18.1 and 108.0  $\text{Bq}/\text{m}^3$ )

| <b>Radon Data</b> | <b>Outcome</b>  | <b>Percentile</b> | <b>Winter</b>           | <b>Spring</b>         | <b>Summer</b>      | <b>Fall</b>           |
|-------------------|-----------------|-------------------|-------------------------|-----------------------|--------------------|-----------------------|
| SRRS              | Total Mortality | 10 <sup>th</sup>  | 0.86 (0.33, 1.4) **     | 1.92 (1.29, 2.55) **  | 0.62 (-0.02, 1.25) | 0.73 (0.24, 1.23) **  |
|                   |                 | 90 <sup>th</sup>  | -0.23 (-0.93, 0.48) **  | 3.73 (2.87, 4.59) **  | 0.78 (0.03, 1.54)  | 2.18 (1.47, 2.9) **   |
|                   | Cardiovascular  | 10 <sup>th</sup>  | 0.94 (0.03, 1.86) **    | 1.73 (0.65, 2.81) **  | 0.58 (-0.55, 1.72) | 0.75 (-0.12, 1.62)    |
|                   |                 | 90 <sup>th</sup>  | -1.21 (-2.46, 0.04) **  | 4.12 (2.59, 5.68) **  | 0.26 (-1.11, 1.65) | 1.73 (0.43, 3.04)     |
|                   | Respiratory     | 10 <sup>th</sup>  | 1.01 (-0.56, 2.61)      | 2.13 (0.24, 4.07) *** | 1.28 (-0.82, 3.43) | 0.26 (-1.3, 1.84) **  |
|                   |                 | 90 <sup>th</sup>  | -0.32 (-2.4, 1.81)      | 9.14 (6.45, 11.9) *** | 1.26 (-1.16, 3.74) | 5.09 (2.79, 7.45) **  |
| LBL               | Total Mortality | 10 <sup>th</sup>  | 0.93 (0.39, 1.48) **    | 2.40 (1.73, 3.06)     | 0.51 (-0.12, 1.15) | 1.00 (0.47, 1.53)     |
|                   |                 | 90 <sup>th</sup>  | -0.46 (-1.24, 0.33) **  | 3.19 (2.17, 4.23)     | 0.96 (0.05, 1.87)  | 1.88 (1.04, 2.72)     |
|                   | Cardiovascular  | 10 <sup>th</sup>  | 0.91 (0.03, 1.8) **     | 2.10 (1, 3.21)        | 0.06 (-1.03, 1.16) | 0.83 (-0.04, 1.72)    |
|                   |                 | 90 <sup>th</sup>  | -1.45 (-2.81, -0.07) ** | 3.75 (1.93, 5.59)     | 1.11 (-0.51, 2.76) | 1.65 (0.17, 3.15)     |
|                   | Respiratory     | 10 <sup>th</sup>  | 0.87 (-0.66, 2.43)      | 3.01 (1.07, 4.99) **  | 0.37 (-1.63, 2.41) | 0.44 (-1.14, 2.05) ** |
|                   |                 | 90 <sup>th</sup>  | -0.22 (-2.46, 2.08)     | 8.52 (5.37, 11.77) ** | 2.78 (-0.08, 5.72) | 5.28 (2.66, 7.97) **  |

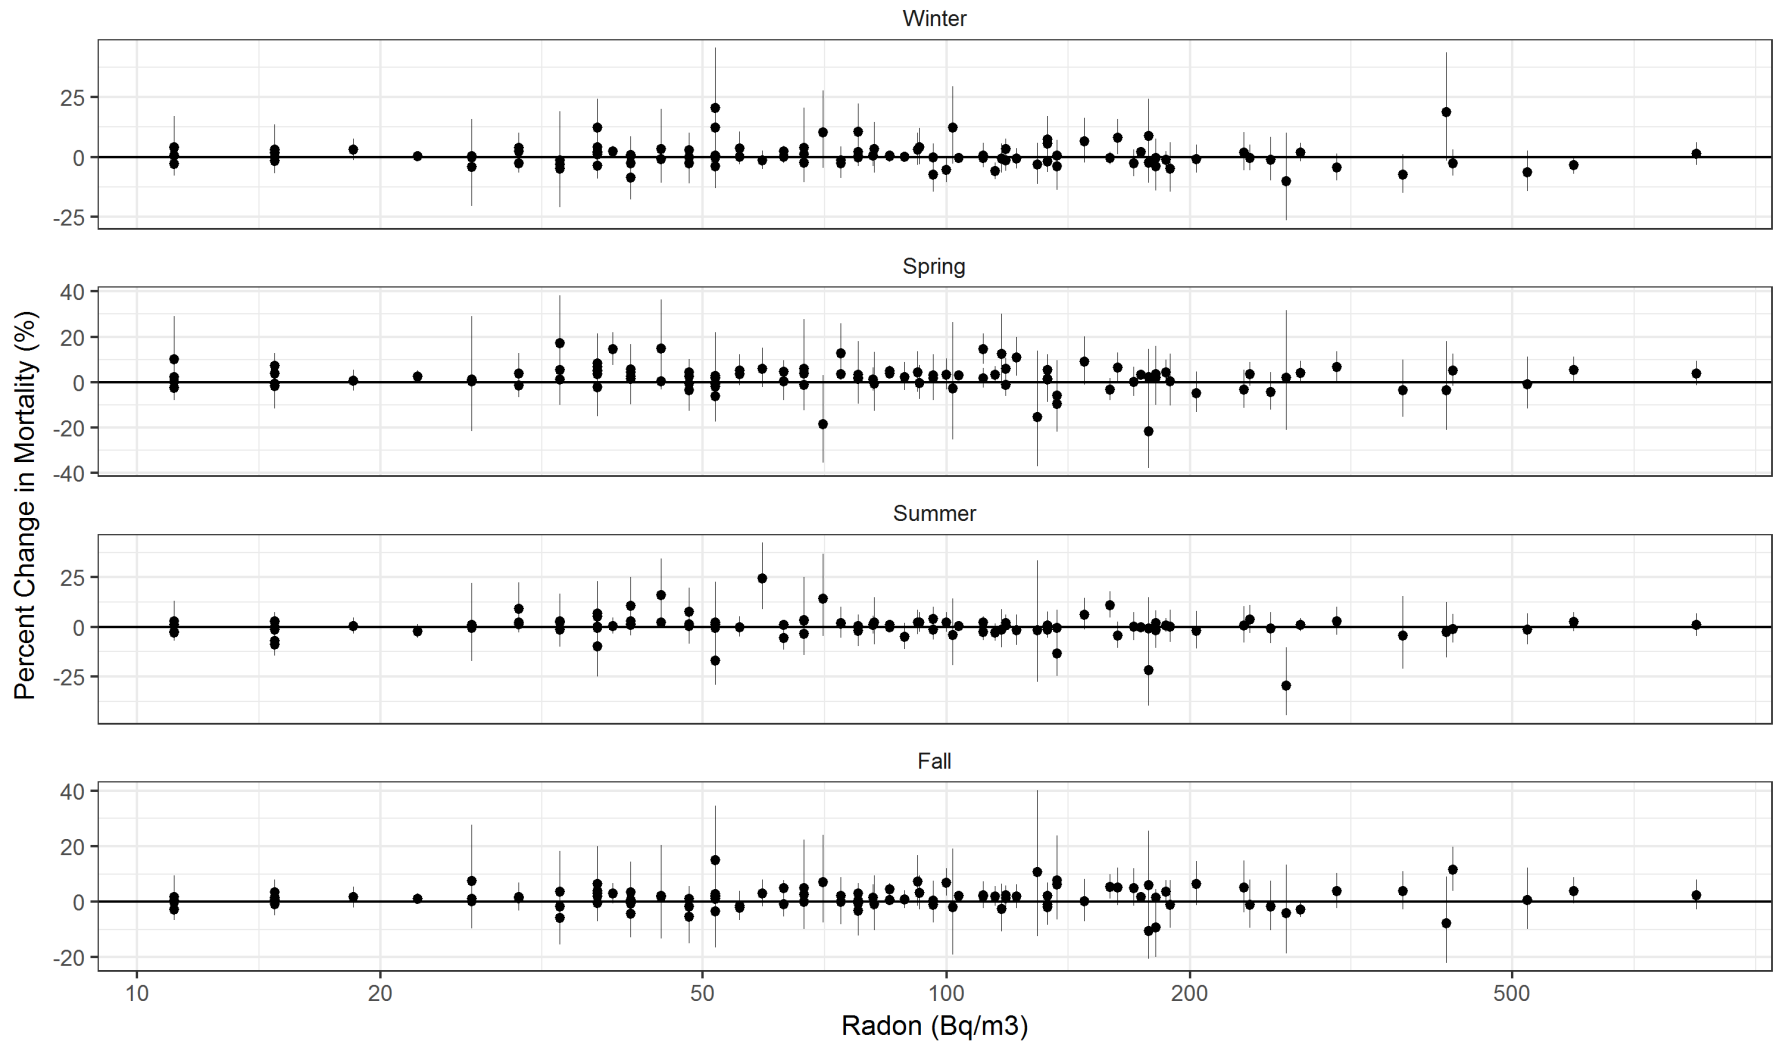

**Figure S1:** Forest plots of city- and season-specific  $PM_{2.5}$  effect estimates, ordered by mean city radon concentrations (SRRS).

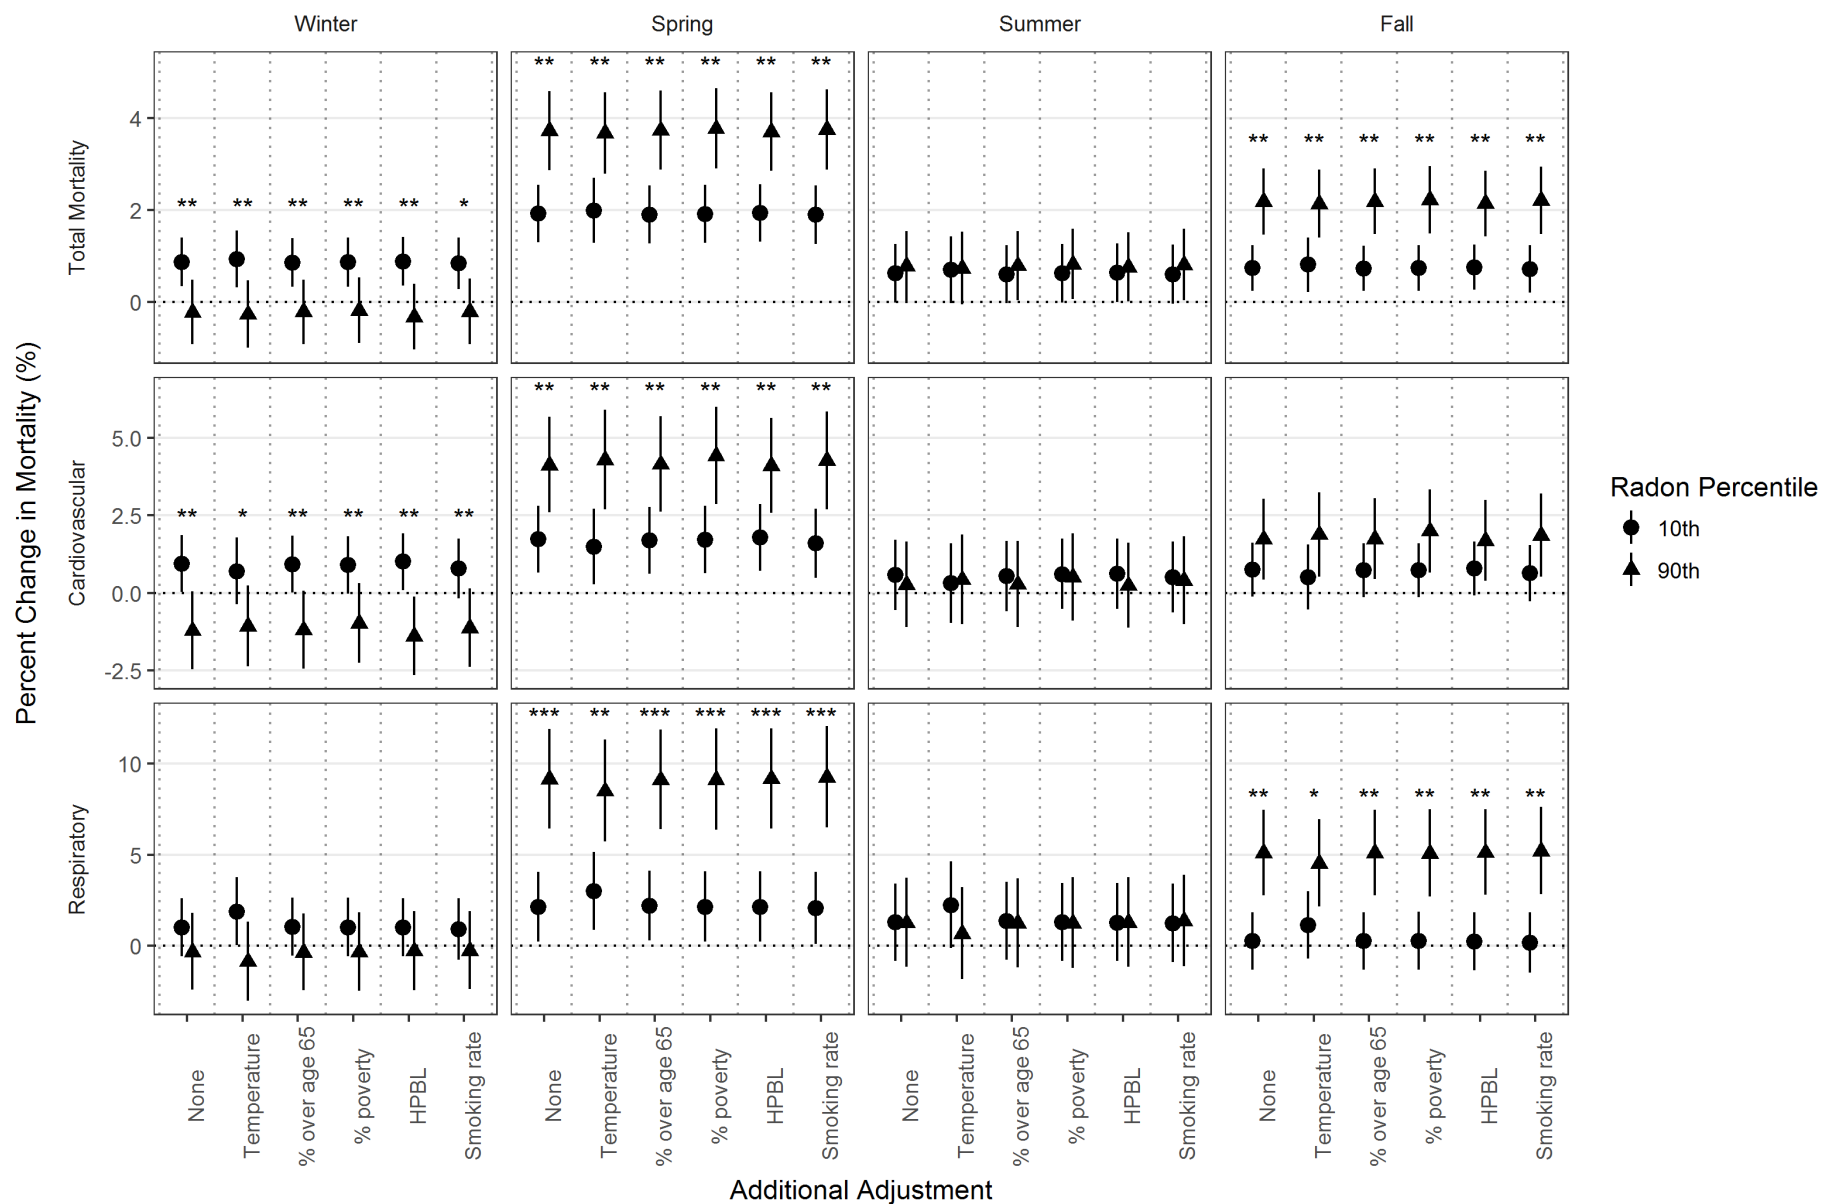

**Figure S2:** Results of the SRRS meta-regression, with and without adjustment for additional city characteristics. Results are presented as the estimated percent change in mortality associated with a 10  $\mu\text{g}/\text{m}^3$  increase in  $\text{PM}_{2.5}$  at the 10<sup>th</sup> and 90<sup>th</sup> percentile of radon and the median value of other spatial variables (if included).

Significance for the  $\ln(\text{radon})$  term: \* p<0.1; \*\* p<0.05; \*\*\* p<0.001

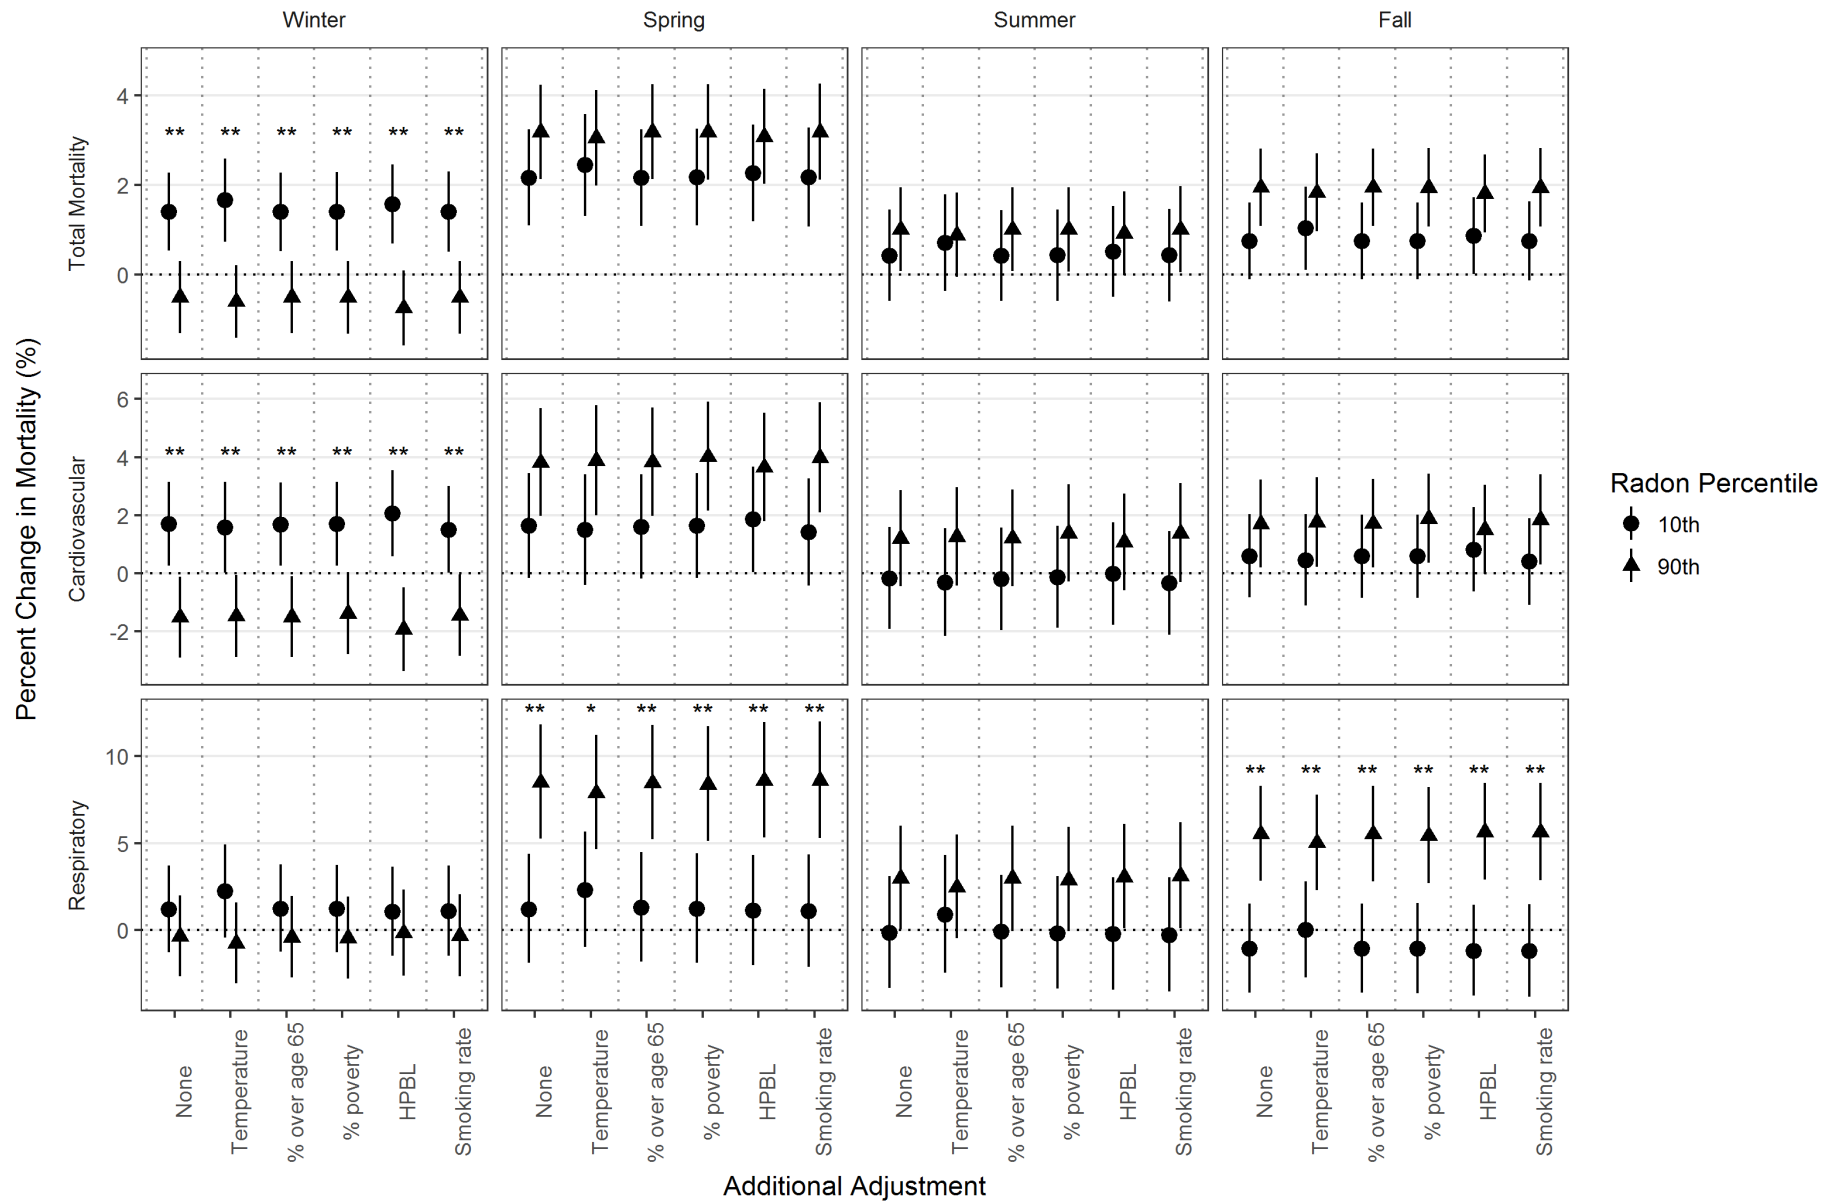

**Figure S3:** Results of the LBL meta-regression, with and without adjustment for additional city characteristics. Results are presented as the estimated percent change in mortality associated with a 10  $\mu\text{g}/\text{m}^3$  increase in  $\text{PM}_{2.5}$  at the 10<sup>th</sup> and 90<sup>th</sup> percentile of radon and the median value of other spatial variables (if included).

Significance for the  $\ln(\text{radon})$  term: \*  $p < 0.1$ ; \*\*  $p < 0.05$ ; \*\*\*  $p < 0.001$
